# Supplementary material for: Precise Species Identification for Acinetobacter: a Genome-Based Study with Description of Two Novel Acinetobacter Species
Source: PubMed Central journal article supplement (PMC8269215; doi:10.1128/msystems.00237-21), 2021-05-26
Supplement: msystems.00237-21-sf002.pdf [file msystems.00237-21-sf002.pdf]

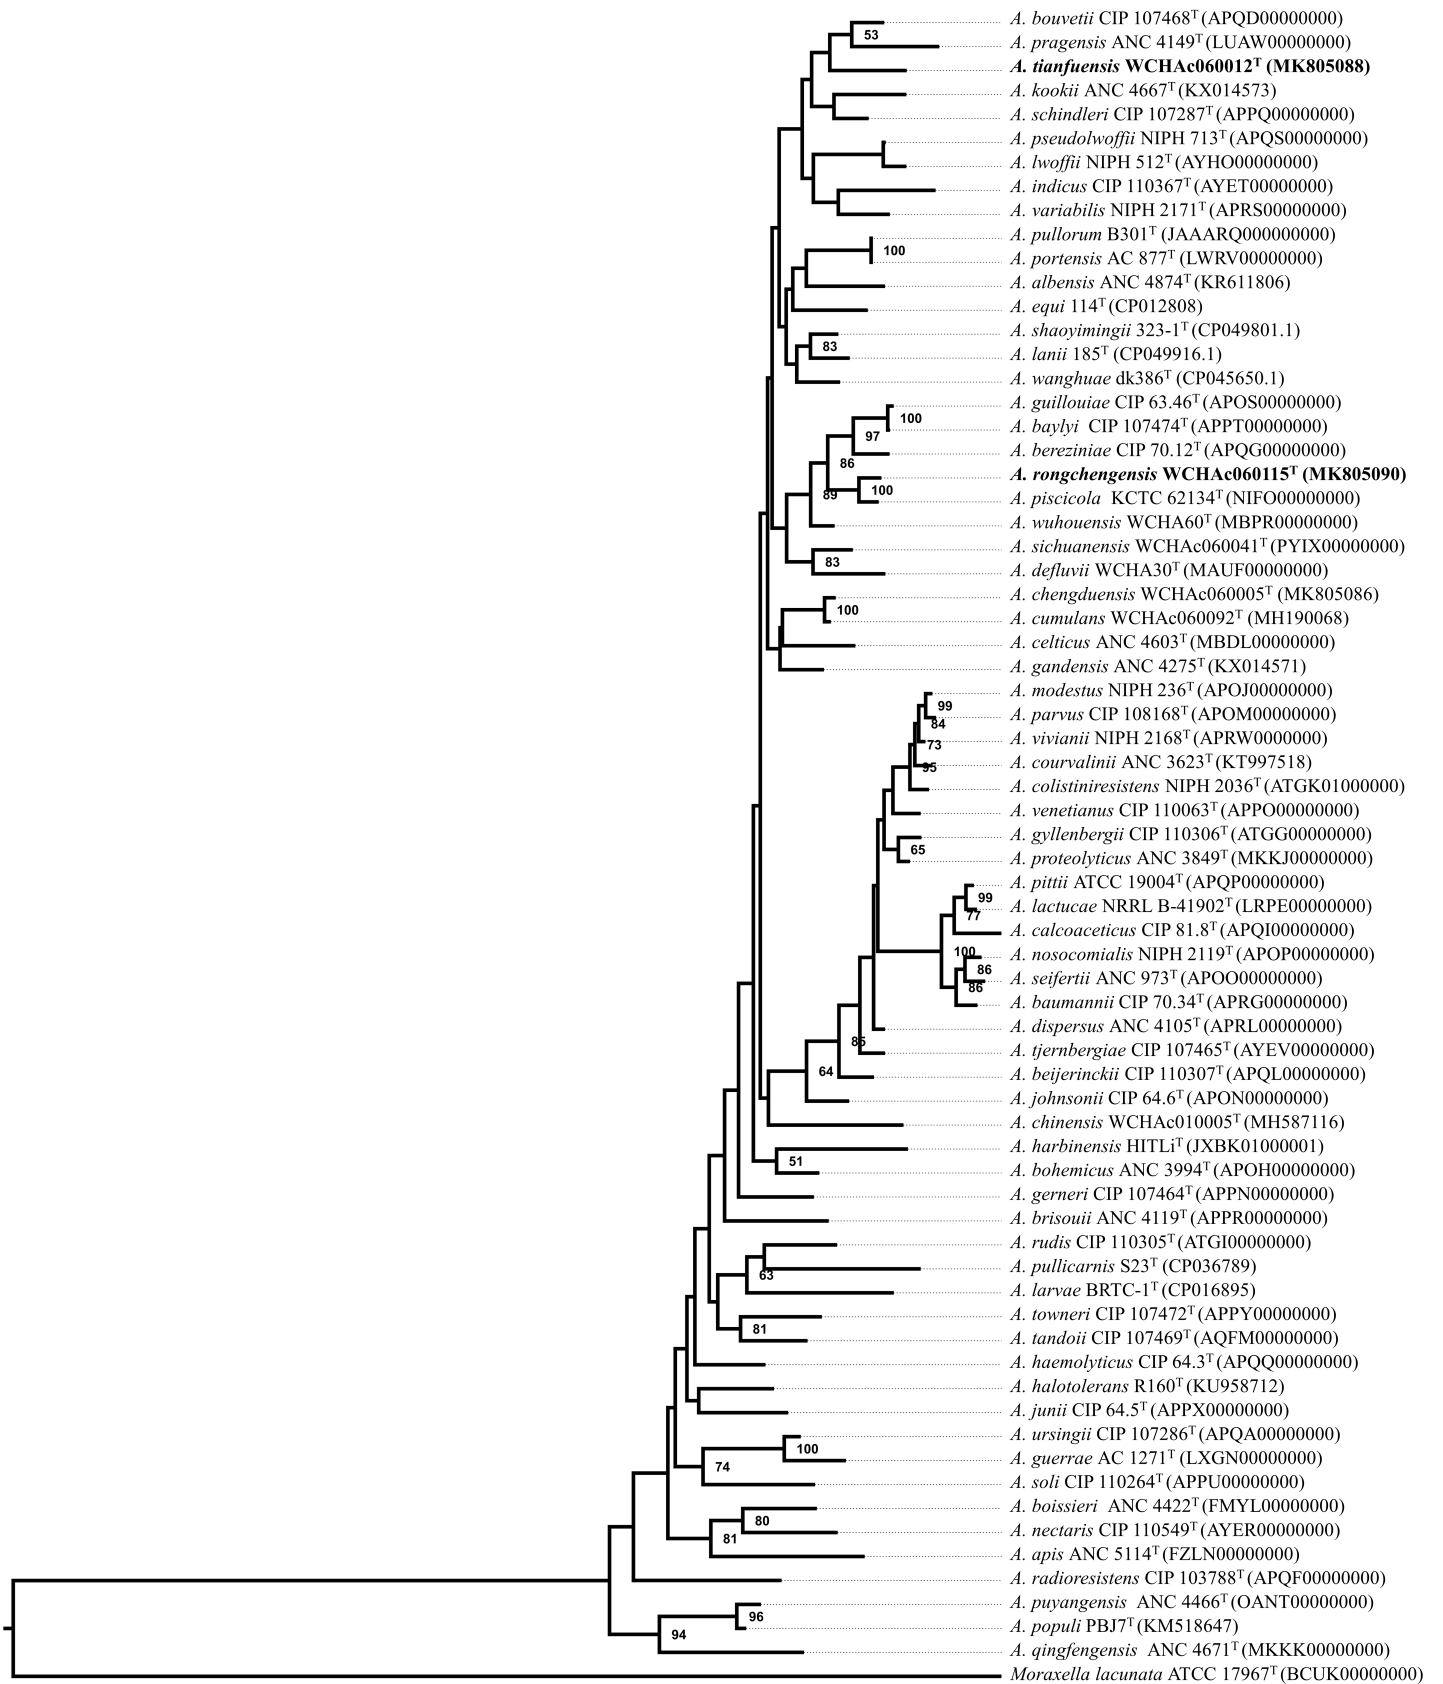

0.2
