# Supplementary material for: Precise Species Identification for Acinetobacter: a Genome-Based Study with Description of Two Novel Acinetobacter Species
Source: PubMed Central journal article supplement (PMC8269215; doi:10.1128/msystems.00237-21), 2021-05-26
Supplement: msystems.00237-21-st001.pdf [file msystems.00237-21-st001.pdf]

**Table S1.** Antimicrobial resistance genes of *A. tianfuensis* WCHAc060012<sup>T</sup> and *A. rongchengensis* WCHAc060115<sup>T</sup>.

|                                                                                        | Genes mediating resistance to |                                          |               |                |                                  |
|----------------------------------------------------------------------------------------|-------------------------------|------------------------------------------|---------------|----------------|----------------------------------|
|                                                                                        | $\beta$ -lactams              | Aminoglycosides                          | Sulphonamides | Tetracyclines  | Macrolides                       |
| WCHAc060012 <sup>T</sup> -                                                             |                               | <i>aph(3'')-Ib</i> ,<br><i>aph(6)-Id</i> | <i>sul2</i>   | <i>tet(39)</i> | <i>mph(E)</i> ,<br><i>msr(E)</i> |
| WCHAc060115 <sup>T</sup> <i>bla</i> <sub>NDM-1</sub> ,<br><i>bla</i> <sub>OXA-58</sub> |                               | <i>aph(3')-VIa</i>                       | <i>sul2</i>   | -              | <i>mph(E)</i> ,<br><i>msr(E)</i> |

-, not found
