# Supplementary material for: Precise Species Identification for Acinetobacter: a Genome-Based Study with Description of Two Novel Acinetobacter Species
Source: PubMed Central journal article supplement (PMC8269215; doi:10.1128/msystems.00237-21), 2021-05-26
Supplement: msystems.00237-21-st002.pdf [file msystems.00237-21-st002.pdf]

**Table S2.** The characteristics of strains of *A. pullorum* and *A. portensis*.

| Characteristics            | <i>A. pullorum</i> |                     | <i>A. portensis</i> |         |         |
|----------------------------|--------------------|---------------------|---------------------|---------|---------|
|                            | B301 <sup>T</sup>  | AC 877 <sup>T</sup> | AC 1335             | AC 1301 | AC 1123 |
| Strains                    | B301 <sup>T</sup>  | AC 877 <sup>T</sup> | AC 1335             | AC 1301 | AC 1123 |
| Catalase                   | +                  | +                   | +                   | +       | +       |
| Oxidase                    | -                  | -                   | -                   | -       | -       |
| Motility                   | -                  | -                   | -                   | -       | -       |
| Growth at 37 °C            | -                  | -                   | -                   | -       | -       |
| Growth at 35 °C            | +                  | ND                  | ND                  | ND      | ND      |
| Growth at 32 °C            | +                  | ND                  | ND                  | ND      | ND      |
| Growth at 30 °C            | +                  | +                   | +                   | +       | +       |
| Growth at 20 °C            | +                  | +                   | +                   | +       | +       |
| Growth on R2A, 30 °C       | +                  | +                   | +                   | +       | +       |
| Growth on TSA, 30 °C       | +                  | +                   | +                   | +       | +       |
| 0.5 % NaCl                 | +                  | +                   | +                   | +       | +       |
| 1.5 % NaCl                 | +                  | +                   | +                   | +       | +       |
| 3.0 % NaCl                 | -                  | +                   | +                   | +       | +       |
| 6.0 % NaCl                 | -                  | -                   | -                   | -       | -       |
| Acidification of D-glucose | +                  | -                   | -                   | -       | -       |
| Hemolysis of horse blood   | ND                 | -                   | -                   | -       | -       |
| Liquefaction of gelatin    | -                  | -                   | -                   | -       | -       |
| Assimilation of            |                    |                     |                     |         |         |
| Acetate                    | ND                 | +                   | +                   | +       | +       |
| trans-Aconitate            | ND                 | -                   | -                   | -       | -       |
| Adipate                    | ND                 | -                   | -                   | -       | -       |
| β-Alanine                  | +                  | -                   | -                   | -       | -       |
| 4-Aminobutyrate            | ND                 | -                   | -                   | -       | -       |
| L-Arabinose                | ND                 | -                   | -                   | -       | -       |
| L-Arginine                 | ND                 | -                   | -                   | -       | -       |
| L-Aspartate                | ND                 | +                   | +                   | +       | +       |
| Benzoate                   | ND                 | -                   | -                   | -       | -       |
| 2,3-Butanediol             | ND                 | -                   | -                   | -       | -       |
| Citrate (Simmons')         | +                  | +                   | +                   | +       | +       |
| Ethanol                    | ND                 | +                   | +                   | +       | -       |
| Gentisate                  | ND                 | -                   | +                   | -       | -       |
| D-Gluconate                | ND                 | -                   | -                   | -       | -       |
| D-Glucose                  | +                  | -                   | -                   | -       | -       |
| L-Glutamate                | ND                 | +                   | +                   | +       | +       |
| Histamine                  | ND                 | -                   | -                   | -       | -       |
| L-Histidine                | +                  | +                   | +                   | +       | +       |
| 4-Hydroxybenzoate          | -                  | -                   | -                   | -       | -       |
| DL-Lactate                 | ND                 | +                   | +                   | +       | +       |
| L-Leucine                  | ND                 | -                   | -                   | -       | -       |
| D-Malate                   | +                  | ND                  | ND                  | ND      | ND      |

|                           |             |           |    |    |    |
|---------------------------|-------------|-----------|----|----|----|
| Malonate                  | -           | -         | -  | -  | -  |
| L-Ornithine               | ND          | -         | -  | -  | -  |
| L-Phenylalanine           | ND          | -         | -  | -  | -  |
| Putrescine                | ND          | -         | -  | -  | -  |
| D-Ribose                  | ND          | -         | -  | -  | -  |
| L-Tartrate                | ND          | -         | -  | -  | -  |
| Tryptamine                | ND          | -         | -  | -  | -  |
| Genome                    |             |           |    |    |    |
| Accession no.             | JAAARQ00000 | LWRV00000 | NA | NA | NA |
|                           | 0000        | 000       |    |    |    |
| Completeness (%)†         | 98.86       | 98.8      | NA | NA | NA |
| Contamination (%)†        | 1.35        | 0.89      | NA | NA | NA |
| Strain heterogeneity (%)† | 14.29       | 0         | NA | NA | NA |
| G+C content (%)§          | 37.0        | 36.6      | NA | NA | NA |
| Contigs                   | 3           | 123       | NA | NA | NA |
| Largest contig (bp)§      | 3,059,385   | 141,290   | NA | NA | NA |
| Total length§             | 3,102,684   | 2,897,281 | NA | NA | NA |
| N50§                      | 3,059,385   | 61,636    | NA | NA | NA |
| L50§                      | 1           | 16        | NA | NA | NA |
| Genome coverage           | 316         | 206       | NA | NA | NA |
| Protein-coding genes      | 2,835       | 2,649     | NA | NA | NA |
| rRNA genes                | 21          | 3         | NA | NA | NA |
| tRNA genes                | 80          | 64        | NA | NA | NA |

Characteristics are scored as: +, positive reaction; –, negative reaction, ND, not determined and NA, not available.

†These were determined using CheckM (1).

§The G+C contents, largest contig, total length, N50 and L50 were calculated using Quast (2).

Data for species are from references (3, 4).

## References

1. Parks D, Imelfort M, Skennerton C, Hugenholz P, Tyson G. 2015. CheckM: assessing the quality of microbial genomes recovered from isolates, single cells, and metagenomes. *Genome Research* 25:1043–1055.
2. Mikheenko A, Prjibelski A, Saveliev V, Antipov D, Gurevich A. 2018. Versatile genome assembly evaluation with QUAST-LG. *Bioinformatics* 34:i142-i150.
3. Carvalheira A, Gonzales-Siles L, Salvà-Serra F, Lindgren Å, Svensson-Stadler L, Thorell K, Piñeiro-Iglesias B, Karlsson R, Silva J, Teixeira P, Moore E. 2020. *Acinetobacter portensis* sp. nov. and *Acinetobacter guerra* sp. nov., isolated from raw meat. *Int J Syst Evol Microbiol* doi:doi: 10.1099/ijsem.0.004311.:doi: 10.1099/ijsem.0.004311.
4. Elnar A, Kim M, Lee J, Han R, Yoon S, Lee G, Yang S, Kim G. 2020. *Acinetobacter pullorum* sp. nov., isolated from chicken meat. *J Microbiol Biotechnol* 30:526-532.
