# Supplementary material for: Precise Species Identification for Acinetobacter: a Genome-Based Study with Description of Two Novel Acinetobacter Species
Source: PubMed Central journal article supplement (PMC8269215; doi:10.1128/msystems.00237-21), 2021-05-26
Supplement: msystems.00237-21-st003.pdf [file msystems.00237-21-st003.pdf]

**Table S3.** The 55 *Acinetobacter* genomes with misidentified species in NCBI

| Strain                            | Accession number | NCBI species                 | Precise species         | ANI, % |
|-----------------------------------|------------------|------------------------------|-------------------------|--------|
| TG31977                           | GCA_003978795.1  | <i>A. baumannii</i>          | <i>A. courvalinii</i>   | 99.86  |
| 4300STDY7045758                   | GCA_900495365.1  | <i>A. baumannii</i>          | <i>A. nosocomialis</i>  | 98.05  |
| 4300STDY7045696                   | GCA_900494785.1  | <i>A. baumannii</i>          | <i>A. nosocomialis</i>  | 98.04  |
| 4300STDY7045796                   | GCA_900495745.1  | <i>A. baumannii</i>          | <i>A. nosocomialis</i>  | 97.98  |
| 4300STDY7045717                   | GCA_900494855.1  | <i>A. baumannii</i>          | <i>A. nosocomialis</i>  | 97.8   |
| 4300STDY7045734                   | GCA_900495105.1  | <i>A. baumannii</i>          | <i>A. nosocomialis</i>  | 97.79  |
| 4300STDY7045890                   | GCA_900496715.1  | <i>A. baumannii</i>          | <i>A. nosocomialis</i>  | 97.78  |
| 4300STDY7045889                   | GCA_900496685.1  | <i>A. baumannii</i>          | <i>A. nosocomialis</i>  | 97.67  |
| 4300STDY7045887                   | GCA_900496515.1  | <i>A. baumannii</i>          | <i>A. pittii</i>        | 97.05  |
| 4300STDY7045719                   | GCA_900495015.1  | <i>A. baumannii</i>          | <i>A. pittii</i>        | 96.98  |
| 1                                 | GCA_000805365.1  | <i>A. baumannii</i>          | <i>A. seifertii</i>     | 96.89  |
| DE0058                            | GCA_008764415.1  | <i>A. baumannii</i>          | <i>A. courvalinii</i>   | 96.4   |
| WPB103                            | GCA_003945465.1  | <i>A. baumannii</i>          | Taxon 45                | 96.8   |
| SFB21                             | GCA_902753875.1  | <i>A. bouvetii</i>           | Taxon 90                | 100    |
| ANC 3811                          | GCA_000399665.1  | <i>A. calcoaceticus</i>      | Taxon 49                | 100    |
| JUb89                             | GCA_004345325.1  | <i>A. calcoaceticus</i>      | Taxon 81                | 100    |
| GK2                               | GCA_001510805.1  | <i>A. calcoaceticus</i>      | Taxon 53                | 100    |
| <i>A. calcoaceticus</i> str. 2117 | GCA_900520355.1  | <i>A. calcoaceticus</i>      | Taxon 53                | 96.34  |
| NIPH 1859                         | GCA_000369765.1  | <i>A. colistiniresistens</i> | Taxon 44                | 100    |
| NCCP 16014                        | GCA_009884975.1  | <i>A. dispersus</i>          | Taxon 43                | 96.83  |
| NCCP 16015                        | GCA_009884295.1  | <i>A. gyllenbergii</i>       | <i>A. proteolyticus</i> | 97.89  |
| KCRI-45                           | GCA_900406805.1  | <i>A. haemolyticus</i>       | Taxon 44                | 96.51  |
| KCRI-348C                         | GCA_900406815.1  | <i>A. haemolyticus</i>       | Taxon 68                | 100    |
| MII                               | GCA_000761495.1  | <i>A. idrijaensis</i>        | <i>A. lwoffii</i>       | 96.08  |
| AJ-1                              | GCA_013186005.1  | <i>A. johnsonii</i>          | Taxon 71                | 98.51  |
| AJ1                               | GCA_012371395.1  | <i>A. johnsonii</i>          | Taxon 71                | 98.6   |
| ANC 3681                          | GCA_000368805.1  | <i>A. johnsonii</i>          | Taxon 42                | 100    |
| MB44                              | GCA_001483265.1  | <i>A. johnsonii</i>          | Taxon 52                | 100    |
| XBB1                              | GCA_001484935.1  | <i>A. johnsonii</i>          | Taxon 52                | 96.03  |
| LXL_C1                            | GCA_003335165.1  | <i>A. johnsonii</i>          | Taxon 52                | 99.59  |
| AJ_082                            | GCA_003939325.1  | <i>A. johnsonii</i>          | Taxon 74                | 100    |
| AJ_385                            | GCA_003940285.1  | <i>A. johnsonii</i>          | Taxon 52                | 96.1   |
| IC001                             | GCA_003952785.1  | <i>A. johnsonii</i>          | Taxon 75                | 100    |
| M19                               | GCA_004337595.1  | <i>A. johnsonii</i>          | Taxon 52                | 96.39  |
| JH7                               | GCA_009823385.1  | <i>A. johnsonii</i>          | Taxon 54                | 96.11  |
| 18QD2AZ57W                        | GCA_009828985.1  | <i>A. johnsonii</i>          | Taxon 54                | 96.2   |
| B23                               | GCA_012271875.1  | <i>A. johnsonii</i>          | Taxon 54                | 96.03  |
| C6                                | GCA_900162715.1  | <i>A. johnsonii</i>          | Taxon 42                | 96     |
| AJ01M                             | GCA_900199565.1  | <i>A. johnsonii</i>          | Taxon 52                | 96.03  |
| TUM15403                          | GCA_009003975.1  | <i>A. oleivorans</i>         | Taxon 46                | 99.77  |
| TUM15548                          | GCA_009013815.1  | <i>A. oleivorans</i>         | Taxon 46                | 96.81  |
| CM11                              | GCA_000962795.1  | <i>A. parvus</i>             | <i>A. modestus</i>      | 96.89  |
| CIT1-2_a                          | GCA_004152775.1  | <i>A. piscicola</i>          | Taxon 76                | 100    |
| AS012629                          | GCA_010612445.1  | <i>A. pittii</i>             | <i>A. lactucae</i>      | 97.69  |
| ANC 4050                          | GCA_000399685.1  | <i>A. pittii</i>             | Taxon 48                | 100    |
| LC510                             | GCA_001005885.2  | <i>A. pittii</i>             | Taxon 66                | 97.05  |
| ABBL016                           | GCA_001432505.1  | <i>A. pittii</i>             | Taxon 51                | 100    |
| PR366                             | GCA_002137095.1  | <i>A. pittii</i>             | Taxon 62                | 100    |
| UBA4954                           | GCA_002397425.1  | <i>A. pittii</i>             | Taxon 62                | 97.52  |
| KCJK7889                          | GCA_003053325.1  | <i>A. pittii</i>             | Taxon 66                | 100    |
| 2012N08-034                       | GCA_003359215.2  | <i>A. pittii</i>             | Taxon 72                | 100    |
| SE63                              | GCA_006965565.1  | <i>A. tandoii</i>            | Taxon 65                | 96.14  |
| SC36                              | GCA_002795165.1  | <i>A. tandoii</i>            | Taxon 65                | 100    |
| 5-2Ac02                           | GCA_001758345.1  | <i>A. townneri</i>           | Taxon 47                | 97.2   |
| SCsl29                            | GCA_009822135.1  | <i>A. variabilis</i>         | Taxon 86                | 100    |
